# Supplementary material
Source: PubMed Central journal article supplement (PMC4558385)
Supplement: NIHMS719201-supplement-online_tables.pdf [file NIHMS719201-supplement-online_tables.pdf]

Supplementary (online only) data for:

Exposure-response relationships for select cancer and non-cancer health outcomes in a cohort of U.S. firefighters from San Francisco, Chicago and Philadelphia (1950-2009)

Robert D. Daniels<sup>1\*</sup>, Stephen Bertke<sup>1</sup>, Matthew M. Dahm<sup>1</sup>, James H. Yiin<sup>1</sup>, Travis L. Kubale<sup>1</sup>, Thomas R. Hales<sup>1</sup>, Dalsu Baris<sup>2</sup>, Shelia H. Zahm<sup>2</sup>, James J. Beaumont<sup>3</sup>, Kathleen M. Waters<sup>1</sup>, Lynne E. Pinkerton<sup>1</sup>

<sup>1</sup>Division of Surveillance, Hazard Evaluations, and Field Studies, National Institute for Occupational Safety and Health, Cincinnati, Ohio, USA

<sup>2</sup>Division of Cancer Epidemiology and Genetics, National Cancer Institute, Gaithersburg, Maryland, USA.

<sup>3</sup>UC Davis Department of Public Health Sciences, Davis, California, USA

\*Corresponding author; NIOSH, DSHEFS, IWSB, 1090 Tusculum Avenue, Mailstop R-13, Cincinnati, OH 45226. Email: rtd2@cdc.gov; Phone: (513) 458-7178, Fax: (513) 841-4470

Table S1. Outcomes of interest

| Underlying cause or cancer diagnosis | ICD-10 codes                       | Cases ( <i>n</i> ) |           |
|--------------------------------------|------------------------------------|--------------------|-----------|
|                                      |                                    | mortality          | incidence |
| All cancers                          | C00-C97 D09.0*                     | 1333               | 2609      |
| MN colorectal                        | C18-C20                            | 144                | 289       |
| MN esophagus                         | C15                                | 61                 | 54        |
| MN lung                              | C33-C34                            | 429                | 382       |
| MN prostate                          | C61                                | 85                 | 832       |
| MN bladder                           | C67, C68, D09.0*                   | NA                 | 174       |
| NHL                                  | C82-C85, C88.0, C88.3, C91.4, C96  | 53                 | 92        |
| Leukemia and aleukemia               | C91.0-C91.3, C91.5-C91.9, C92-C95  | 52                 | 58        |
| IHD                                  | I20-I22, I24-I25, I51.3, I51.6     | 914                | NA        |
| CeVD                                 | G45.0-G45.2, G45.4-G45.9, I60-I69  | 124                | NA        |
| COPD                                 | J40-J44                            | 130                | NA        |
| Cirrhosis (alcohol related)          | K70, K74-K76, (excl. K75.4, K76.0) | 99                 | NA        |

\* includes *in situ* bladder tumors, D09.0, in incidence analysis only.

CeVD, cerebrovascular disease; COPD, chronic obstructive pulmonary disease; International Classification of Diseases, ICD; IHD, ischemic heart disease; MN, malignancy; NHL, non-Hodgkin lymphoma.

Table S2. Hazard ratios (HRs) at time since exposure (TSE)\*

| Underlying cause of death | Base model<br>HR @ 4600 runs | Exposure windows for TSE (HR @ 4600 fire-runs) |                        |                     | LRT<br>p-value <sup>†</sup> |
|---------------------------|------------------------------|------------------------------------------------|------------------------|---------------------|-----------------------------|
|                           |                              | lag to lag+10 years                            | lag+10 to lag+20 years | >lag+20 years       |                             |
| All cancers               | 0.95 (0.89 to 1.01)          | 0.93 (0.78 to 1.09)                            | 1.00 (0.87 to 1.15)    | 0.90 (0.79 to 1.02) | 0.622                       |
| MN colorectal             | 0.69 (0.55 to 0.86)          | 0.68 (0.38 to 1.18)                            | 0.85 (0.53 to 1.34)    | 0.53 (0.32 to 0.83) | 0.408                       |
| MN esophagus              | 0.99 (0.73 to 1.32)          | 0.88 (0.38 to 1.88)                            | 1.25 (0.65 to 2.24)    | 0.80 (0.40 to 1.44) | 0.675                       |
| MN lung                   | 1.07 (0.97 to 1.19)          | 1.06 (0.80 to 1.37)                            | 1.08 (0.86 to 1.34)    | 1.08 (0.88 to 1.32) | 0.987                       |
| MN prostate               | 0.73 (0.55 to 0.94)          | 0.60 (0.21 to 1.53)                            | 0.68 (0.35 to 1.23)    | 0.80 (0.52 to 1.18) | 0.807                       |
| NHL                       | 0.78 (0.55 to 1.07)          | 0.92 (0.29 to 2.50)                            | 0.77 (0.30 to 1.75)    | 0.75 (0.43 to 1.20) | 0.935                       |
| Leukemia                  | 1.08 (0.78 to 1.44)          | 1.51 (0.65 to 3.21)                            | 1.52 (0.71 to 2.93)    | 0.70 (0.38 to 1.19) | 0.123                       |
| IHD                       | 0.92 (0.85 to 1.00)          | 0.83 (0.68 to 1.01)                            | 0.88 (0.73 to 1.06)    | 1.05 (0.90 to 1.22) | 0.12                        |
| CeVD                      | 0.87 (0.69 to 1.08)          | 1.10 (0.63 to 1.84)                            | 0.89 (0.53 to 1.43)    | 0.71 (0.45 to 1.07) | 0.394                       |
| Cirrhosis                 | 0.80 (0.60 to 1.04)          | 0.92 (0.53 to 1.53)                            | 0.71 (0.39 to 1.23)    | 0.77 (0.38 to 1.41) | 0.834                       |
| COPD                      | 0.95 (0.78 to 1.15)          | 0.62 (0.29 to 1.26)                            | 1.21 (0.76 to 1.87)    | 0.91 (0.64 to 1.24) | 0.426                       |

\* All temporal models are piecewise loglinear adjusted for race, fire department, and birth cohort. The exposure lag used for NHL and leukemia was 5 years; all others lagged 10 years.

<sup>†</sup>p- value of likelihood ratio test comparing the base model to the model with two or more exposure windows.

CeVD, cerebrovascular disease; COPD, chronic obstructive pulmonary disease; HR, hazard ratio; IHD, ischemic heart disease; LRT, likelihood ratio test; MN, malignant neoplasm; NHL, non-Hodgkin lymphoma

Table S3. Hazard ratios (HRs) for temporal factors age at exposure (AE) and exposure period (EP)\*

| Underlying cause of death | Base model<br>HR @ 4600 runs | Exposure windows for AE (HR @ fire-4600 runs) |                     |                | Exposure windows for EP (HR @ 4600 runs) |                     |                             |
|---------------------------|------------------------------|-----------------------------------------------|---------------------|----------------|------------------------------------------|---------------------|-----------------------------|
|                           |                              | <40 years                                     | 40+ years           | LRT<br>p-value | <1970                                    | 1970+               | LRT<br>p-value <sup>†</sup> |
| All cancers               | 0.95 (0.89 to 1.01)          | 0.96 (0.86 to 1.07)                           | 0.94 (0.84 to 1.04) | 0.797          | 0.94 (0.83 to 1.06)                      | 0.95 (0.87 to 1.03) | 0.915                       |
| MN colorectal             | 0.69 (0.55 to 0.86)          | 0.67 (0.45 to 0.99)                           | 0.70 (0.49 to 0.98) | 0.885          | 0.70 (0.45 to 1.05)                      | 0.69 (0.50 to 0.92) | 0.94                        |
| MN esophagus              | 0.99 (0.73 to 1.32)          | 1.23 (0.76 to 1.90)                           | 0.77 (0.44 to 1.29) | 0.253          | 1.51 (0.86 to 2.47)                      | 0.79 (0.52 to 1.17) | 0.083                       |
| MN lung                   | 1.07 (0.97 to 1.19)          | 0.97 (0.81 to 1.16)                           | 1.17 (0.99 to 1.37) | 0.194          | 1.06 (0.87 to 1.29)                      | 1.08 (0.94 to 1.24) | 0.922                       |
| MN prostate               | 0.73 (0.55 to 0.94)          | 0.72 (0.42 to 1.16)                           | 0.73 (0.50 to 1.04) | 0.953          | 0.91 (0.55 to 1.44)                      | 0.63 (0.43 to 0.91) | 0.299                       |
| NHL                       | 0.78 (0.55 to 1.07)          | 0.88 (0.49 to 1.47)                           | 0.70 (0.40 to 1.16) | 0.601          | 0.49 (0.21 to 1.00)                      | 0.92 (0.61 to 1.35) | 0.157                       |
| Leukemia                  | 1.08 (0.78 to 1.44)          | 0.95 (0.52 to 1.62)                           | 1.19 (0.73 to 1.85) | 0.598          | 0.95 (0.48 to 1.72)                      | 1.14 (0.76 to 1.66) | 0.652                       |
| IHD                       | 0.92 (0.85 to 1.00)          | 0.93 (0.81 to 1.07)                           | 0.92 (0.80 to 1.04) | 0.886          | 1.01 (0.87 to 1.17)                      | 0.87 (0.78 to 0.98) | 0.15                        |
| Stroke                    | 0.87 (0.69 to 1.08)          | 0.79 (0.52 to 1.17)                           | 0.93 (0.66 to 1.27) | 0.592          | 1.07 (0.71 to 1.54)                      | 0.76 (0.55 to 1.03) | 0.222                       |
| Cirrhosis                 | 0.80 (0.60 to 1.04)          | 0.65 (0.42 to 0.97)                           | 1.07 (0.64 to 1.70) | 0.174          | 0.85 (0.49 to 1.38)                      | 0.78 (0.55 to 1.07) | 0.798                       |
| COPD                      | 0.95 (0.78 to 1.15)          | 0.84 (0.57 to 1.22)                           | 1.03 (0.77 to 1.35) | 0.459          | 1.06 (0.72 to 1.53)                      | 0.89 (0.67 to 1.17) | 0.513                       |

\* All temporal models are piecewise loglinear adjusted for race, fire department, and birth cohort. The exposure lag used for NHL and leukemia was 5 years; all others lagged 10 years

<sup>†</sup>p- value of likelihood ratio test comparing the base model to the model with two or more exposure windows..

CeVD, cerebrovascular disease; COPD, chronic obstructive pulmonary disease; HR, hazard ratio; IHD, ischemic heart disease; LRT, likelihood ratio test; MN, malignant neoplasm; NHL, non-Hodgkin lymphoma
